# Supplementary material
Source: publisher figshare collection journal article supplement (https://tandf.figshare.com/ndownloader/files/20025035)
Supplement: Supplementary file 1 [file 20025035]

**Figure 2. Cost-effectiveness of PTSD loss of diagnosisa in main analysis (EM) after bootstrapping (n = 2500) comparing EMDR and PE to WL: ICER planes and acceptability curves.**

| **EMDR vs WL:** Societal costs and Loss of Diagnosis  Q2 = 0.0%  Q1 = 1.1%  Q3 = 0.1%  Q4 = 98.8 % | **PE vs WL:** Societal costs and Loss of Diagnosis  Q1 = 0.3%  Q1 =28.9%  Q1 = 0.0%  Q1 = 70.8% |
| --- | --- |
| **EMDR vs WL**: cost-utility acceptability curve and Loss of Diagnosis  **Probability of PE being cost-effective**  **Probability of EMDR being cost-effective** | **PE vs WL**: cost-utility acceptability curve and Loss of Diagnosis |

Abbreviations: CAU, care as usual; EMDR, eye movement desensitization and reprocessing; ICER, incremental cost-effectiveness ratio; PE, prolonged exposure; PTSD, post traumatic stress disorder; QALY, Quality Adjusted Life Year; Q1, Quadrant 1 (more effective, more expensive); Q2, Quadrant 2 (the inferior quadrant: less effective, more expensive); Q3, Quadrant 3 (less effective, less expensive); Q4, Quadrant 4 (the dominant quadrant: more effective, less expensive).

a ‘PTSD loss of diagnosis’ indicates the combination of no longer meeting CAPS IV-PTSD criteria + CAPS IV -severity score < 45.
